# Supplementary material for: Polynitroxide copolymers to reduce biofilm fouling on surfaces
Source: Royal Society of Chemistry journal article supplement (doi:10.1039/c8py01101j), 2018-01-01
Supplement: c8py01101j1.pdf [file c8py01101j1.pdf]

## Electronic Supplementary Information (ESI)

### Polynitroxide copolymers to reduce biofilm fouling on surfaces

Nathan R.B. Boase,<sup>a</sup> Marcelo D.T. Torres,<sup>b,c,d</sup> Nicholas L. Fletcher,<sup>e,f</sup> Cesar de la Fuente-Nunez,<sup>b,c</sup> and Kathryn E. Fairfull-Smith<sup>\*a</sup>

<sup>a</sup>School of Chemistry, Physics and Mechanical Engineering, Queensland University of Technology (QUT), 2 George St, Brisbane, Australia.

<sup>b</sup>Synthetic Biology Group, MIT Synthetic Biology Center, Department of Biological Engineering and Electrical Engineering & Computer Science, Research Laboratory of Electronics, Massachusetts Institute of Technology, 77 Massachusetts Ave, Cambridge, MA, USA.

<sup>c</sup>Broad Institute of Massachusetts Institute of Technology and Harvard, 415 Main St, Cambridge, MA, USA.

<sup>d</sup>Centro de Ciências Naturais e Humanas, Universidade Federal do ABC, 5001 Avenida dos Estados, Santo Andre, SP, Brazil.

<sup>e</sup>Centre for Advanced Imaging, University of Queensland, St Lucia, Queensland 4072, Australia

<sup>f</sup>Australian Institute for Bioengineering and Nanotechnology, ARC Centre of Excellence in Convergent Bio-Nano Science and Technology, University of Queensland, St. Lucia, Queensland 4072, Australia

#### Table of Contents:

|                                                                                                                                                                                                                                                                                                                                                                               |   |
|-------------------------------------------------------------------------------------------------------------------------------------------------------------------------------------------------------------------------------------------------------------------------------------------------------------------------------------------------------------------------------|---|
| Figure 1: Model reaction determining stability of trithiocarbonate RAFT agent to aminolysis by TMPM monomer. (a) UV-Vis absorbance spectrum of model reaction (100 TMPM:1 CPPTTC, dioxane) at 85 °C at 0 and 6 h, (b) Absorbance of trithiocarbonate RAFT agent from model reaction at 308 nm, showing stability over time (each time point average of two measurements)..... | 2 |
| Figure 2: <sup>1</sup> H NMR spectrum of a mixture of TMPM and CPPTTC at polymerisation concentrations and heated at 85 °C in dioxane for 5 hours. Peak D represents the $\alpha$ -methylene of the Z-group of the RAFT agent and show's no evidence of aminolysis to form any free pentane thiol. ....                                                                       | 2 |
| Figure 3. Normalised SEC traces of PTMPM-PMMA copolymers syntehsised in this study. SEC was run at 60 °C with DMAc with 1% LiBr was used as eluent. ....                                                                                                                                                                                                                      | 3 |
| Figure 4: UV-Vis characterisation of the removal of trithiocarbonate groups from the polymers by oxidation, as evidenced by characteristic loss of thiocarbonylthio peak at 308 nm. ....                                                                                                                                                                                      | 3 |
| Figure 5: <sup>1</sup> H NMR spectroscopic characterisation of the removal of trithiocarbonate groups from the polymers by oxidation, as evidenced by characteristic loss of $\alpha$ -methylene of the Z-group of the RAFT agent. ....                                                                                                                                       | 4 |
| Figure 6: EPR spectroscopy standard curve of TEMPO used to quantify nitroxide concentration in polymers. (a) EPR spectra of TEMPO from 0 – 1 mM, (b) standard curve of the double integral of the EPR spectra in (a). Slope = 2100000 M <sup>-1</sup> (r <sup>2</sup> = 0.9999). ....                                                                                         | 5 |
| Figure 7: UV-Vis standard curve of TEMPO used to quantify nitroxide concentration in polymers. (a) UV-Vis spectra of TEMPO from 0 – 10 mM, (b) standard curve of max absorbance at 460 nm. E= 11.72 M <sup>-1</sup> .cm <sup>-1</sup> (r <sup>2</sup> = 1).....                                                                                                               | 5 |
| Figure 8: Optimisation of spin coating conditions, for (a) spin conditions and (b) concentration, using 100 wt% PMMA in toluene. ....                                                                                                                                                                                                                                         | 5 |
| Figure 9: 3D view of AFM measurement of 100% PMMA film, spin coated onto silicon wafer demonstrating that the surface is smooth without features. RMS roughness of entire FOV $\pm$ 3.0 nm (255 $\mu$ m <sup>2</sup> ). Some dust particles are evident on the surface as the narrow and intense peaks approximately 70 nm high. ....                                         | 6 |
| Figure 10: XPS survey spectrum of 100 wt% PTMA and 0 wt% PTMA films. ....                                                                                                                                                                                                                                                                                                     | 6 |
| Figure 11: High resolution XPS spectra of the C1s region for each of the PTMA-PMMA copolymers.....                                                                                                                                                                                                                                                                            | 7 |
| Figure 12: High resolution XPS spectra of the C1s region for each of the PTMA-PMMA copolymers.....                                                                                                                                                                                                                                                                            | 7 |
| Figure 13: Replicate high resolution XPS N1s spectra acquired for the same 100 wt% PTMA film, at three different locations, demonstrating the variability of the peak at 406 eV. ....                                                                                                                                                                                         | 8 |
| Figure 14: High resolution XPS N1s spectrum of neat PTMA powder, showing that there is no peak at 306 eV for the oxoammonium cation. ....                                                                                                                                                                                                                                     | 8 |
| Table 1: Summary statistics for two-way ANOVA analysis of anti-biofilm activity of nitroxide copolymer surfaces. ....                                                                                                                                                                                                                                                         | 9 |

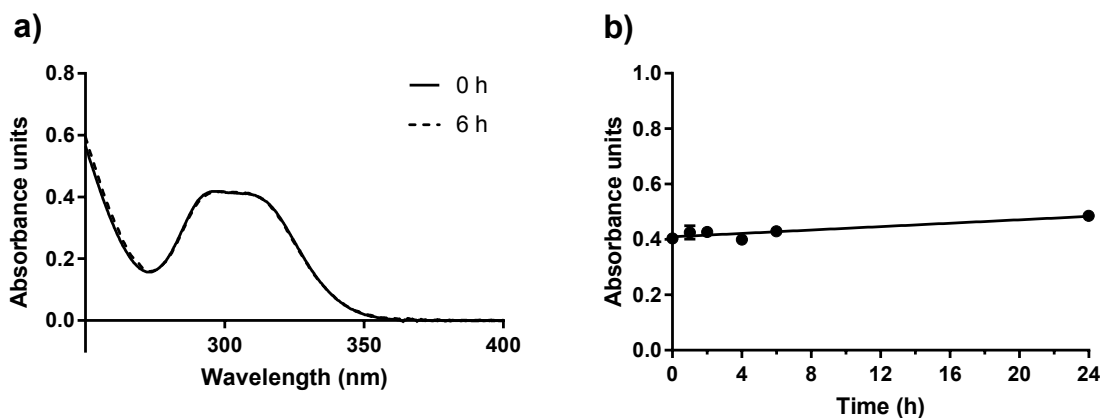

Figure 1: Model reaction determining stability of trithiocarbonate RAFT agent to aminolysis by TMPM monomer. (a) UV-Vis absorbance spectrum of model reaction (100 TMPM:1 CPPTTC, dioxane) at 85°C at 0 and 6 h, (b) Absorbance of trithiocarbonate RAFT agent from model reaction at 308 nm, showing stability over time (each time point average of two measurements).

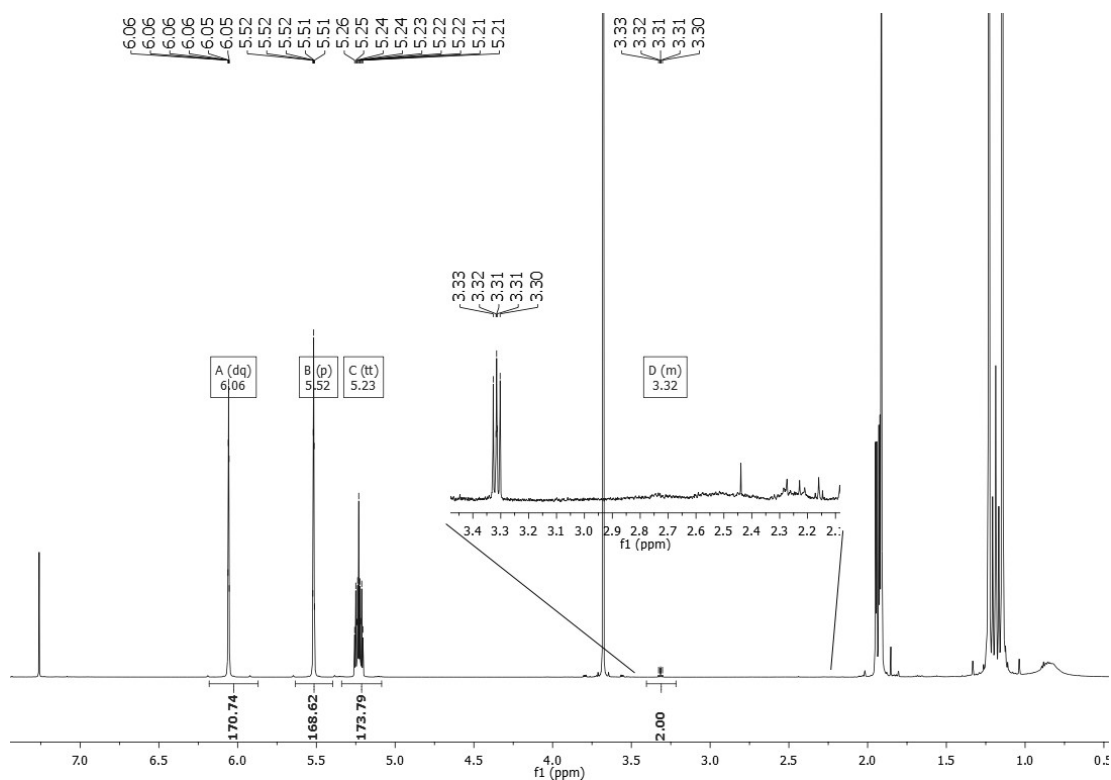

Figure 2:  $^1\text{H}$  NMR spectrum of a mixture of TMPM and CPPTTC at polymerisation concentrations and heated at 85 °C in dioxane for 5 hours. Peak D represents the  $\alpha$ -methylene of the Z-group of the RAFT agent and show's no evidence of aminolysis to form any free pentane thiol.

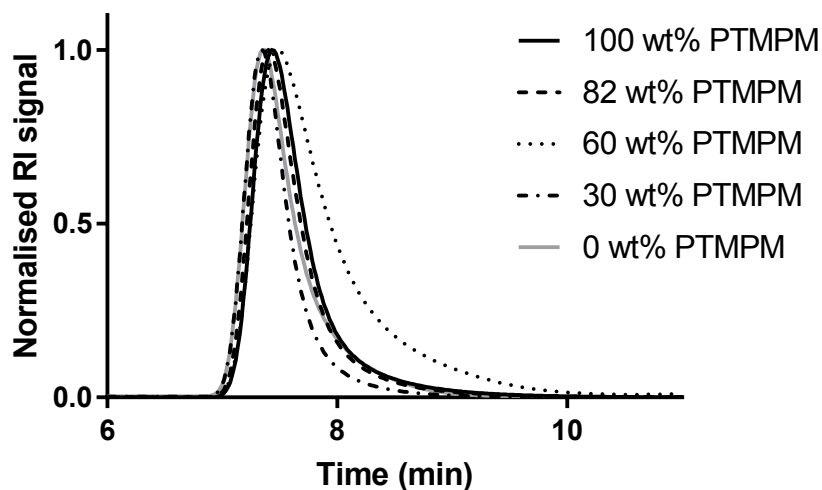

Figure 3. Normalised SEC traces of PTMPM-PMMA copolymers synthesised in this study. SEC was run at 60 °C with DMAc with 1% LiBr was used as eluent.

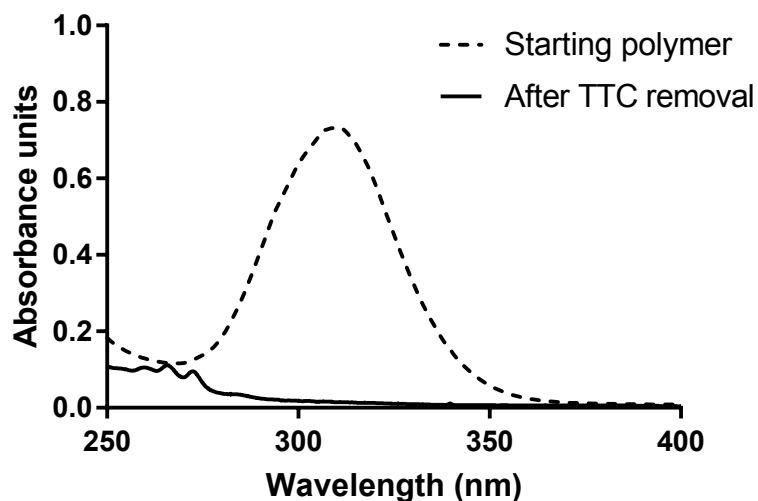

Figure 4: UV-Vis characterisation of the removal of trithiocarbonate groups from the polymers by oxidation, as evidenced by characteristic loss of thiocarbonylthio peak at 308 nm.

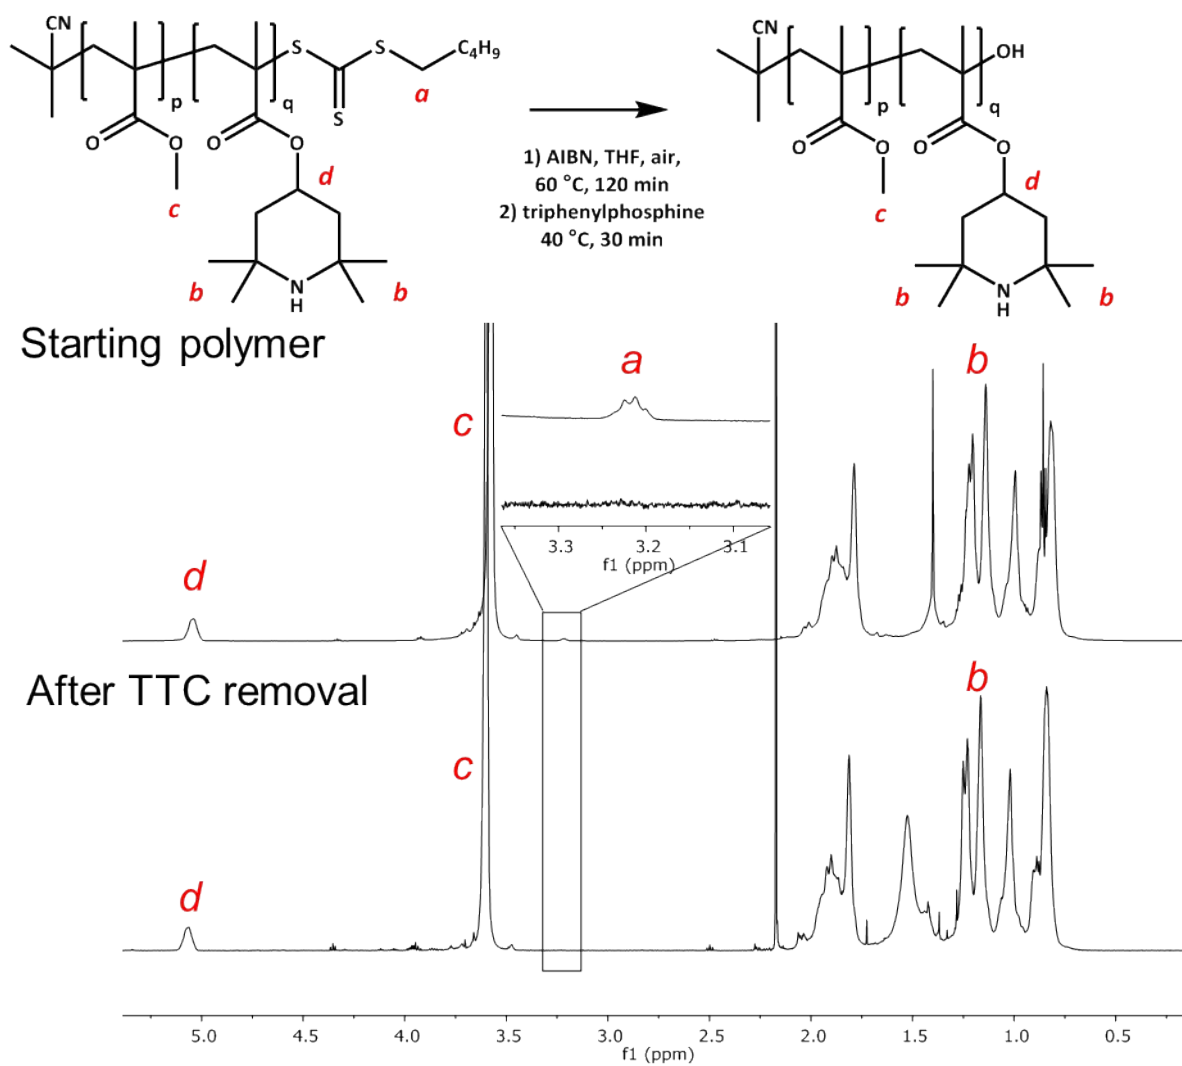

Figure 5:  $^1\text{H}$  NMR spectroscopic characterisation of the removal of trithiocarbonate groups from the polymers by oxidation, as evidenced by characteristic loss of  $\alpha$ -methylene of the Z-group of the RAFT agent.

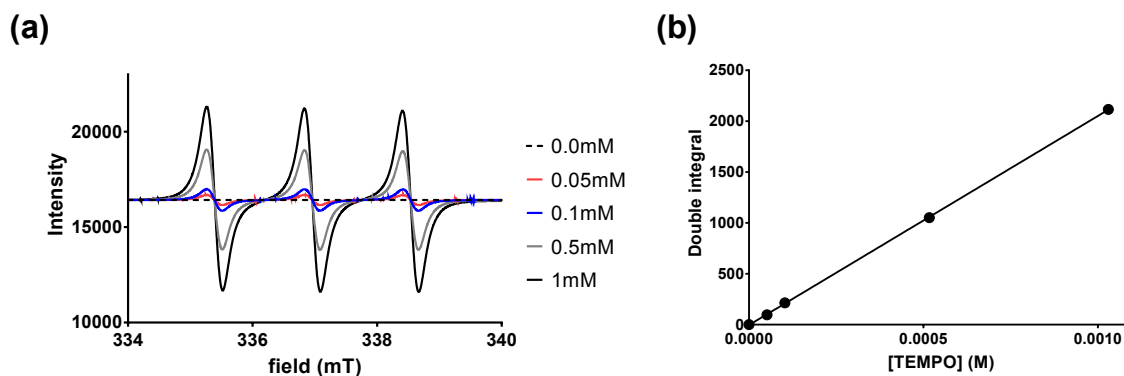

Figure 6: EPR spectroscopy standard curve of TEMPO used to quantify nitroxide concentration in polymers. (a) EPR spectra of TEMPO from 0 – 1 mM, (b) standard curve of the double integral of the EPR spectra in (a). Slope =  $2100000 \text{ M}^{-1}$  ( $r^2 = 0.9999$ ).

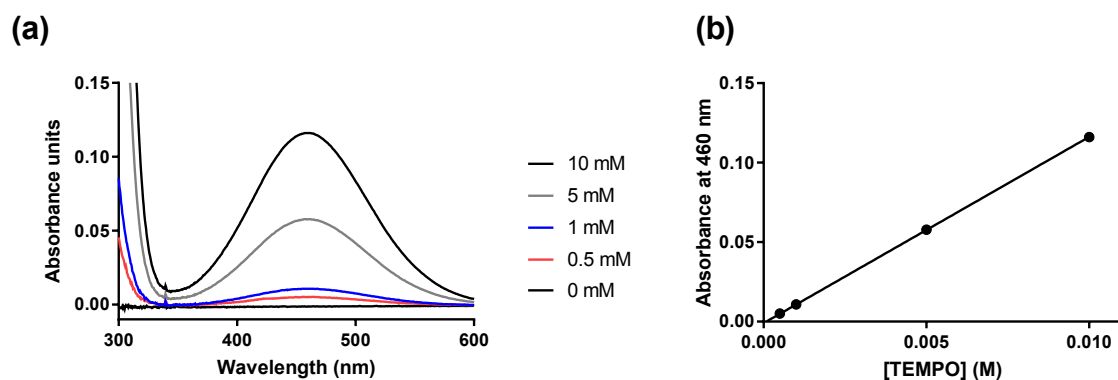

Figure 7: UV-Vis standard curve of TEMPO used to quantify nitroxide concentration in polymers. (a) UV-Vis spectra of TEMPO from 0 – 10 mM, (b) standard curve of max absorbance at 460 nm.  $E = 11.72 \text{ M}^{-1} \cdot \text{cm}^{-1}$  ( $r^2 = 1$ ).

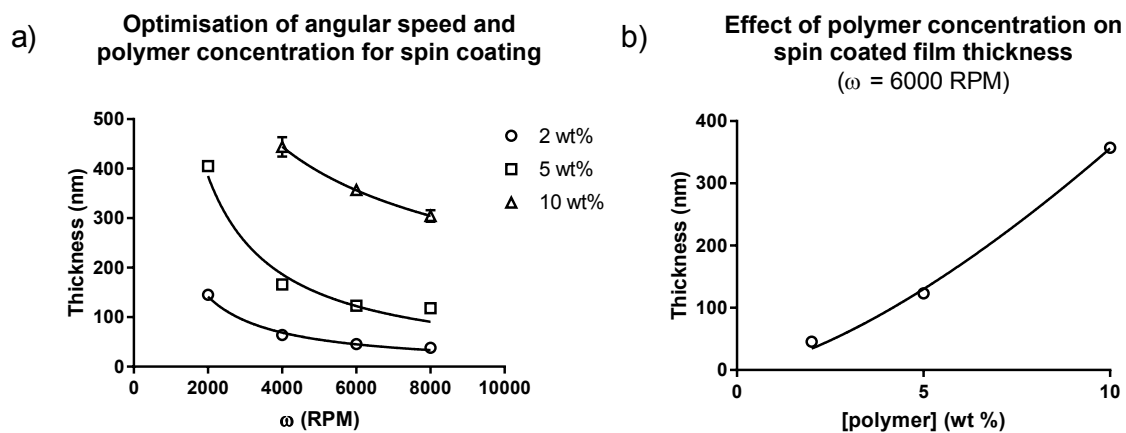

Figure 8: Optimisation of spin coating conditions, for (a) spin conditions and (b) concentration, using 100 wt% PMMA in toluene.

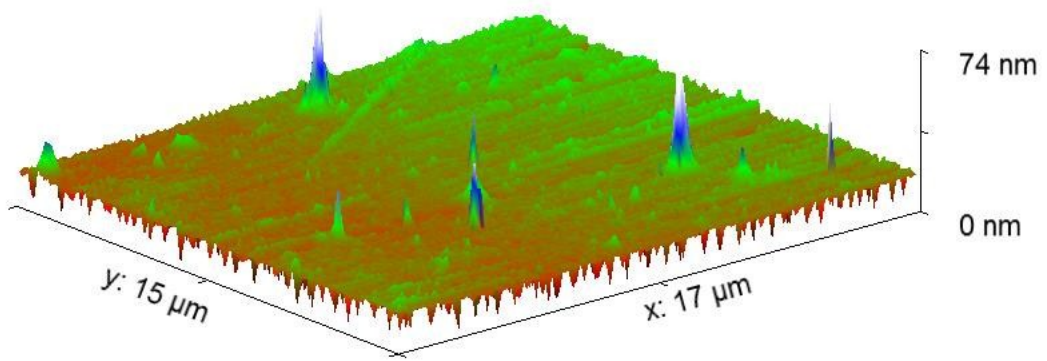

Figure 9: 3D view of AFM measurement of 100% PMMA film, spin coated onto silicon wafer demonstrating that the surface is smooth without features. RMS roughness of entire FOV  $\pm 3.0$  nm ( $255 \mu\text{m}^2$ ). Some dust particles are evident on the surface as the narrow and intense peaks approximately 70 nm high.

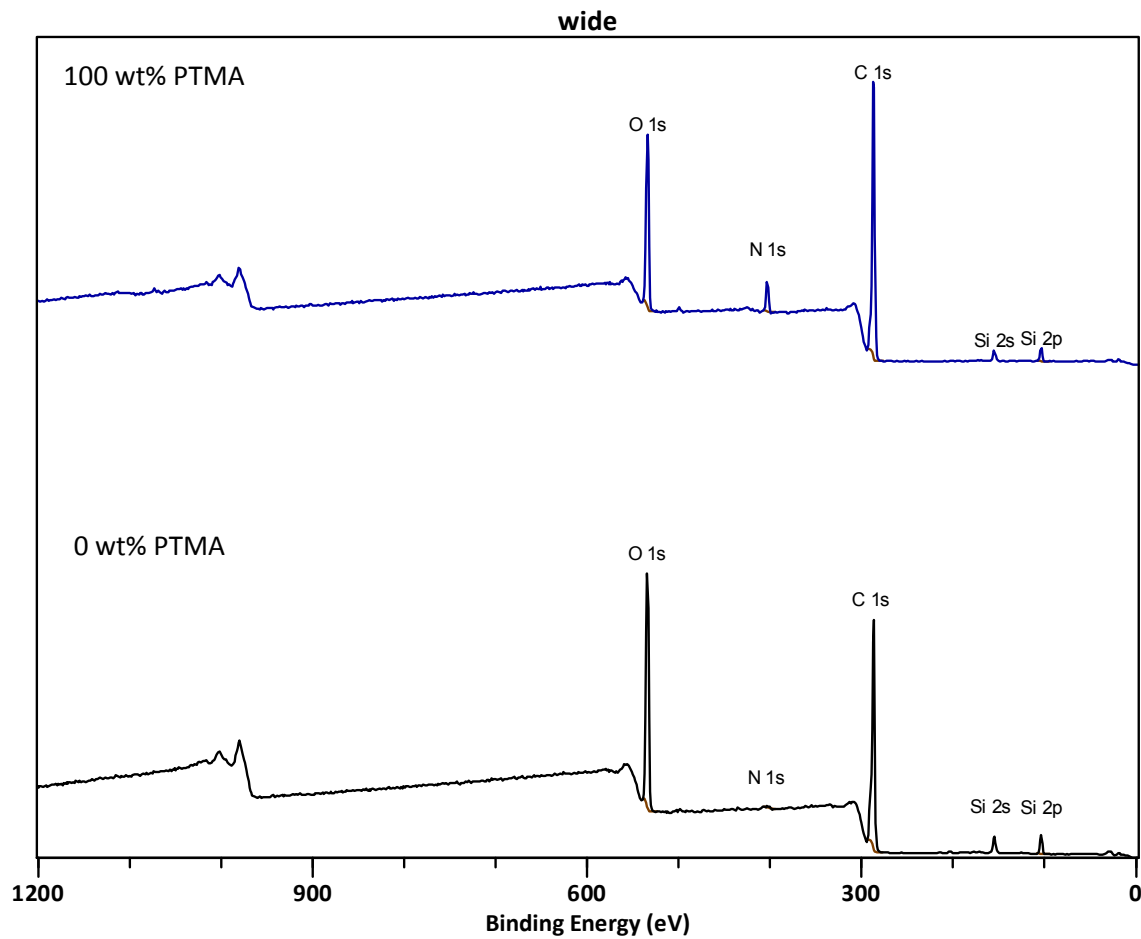

Figure 10: XPS survey spectrum of 100 wt% PTMA and 0 wt% PTMA films.

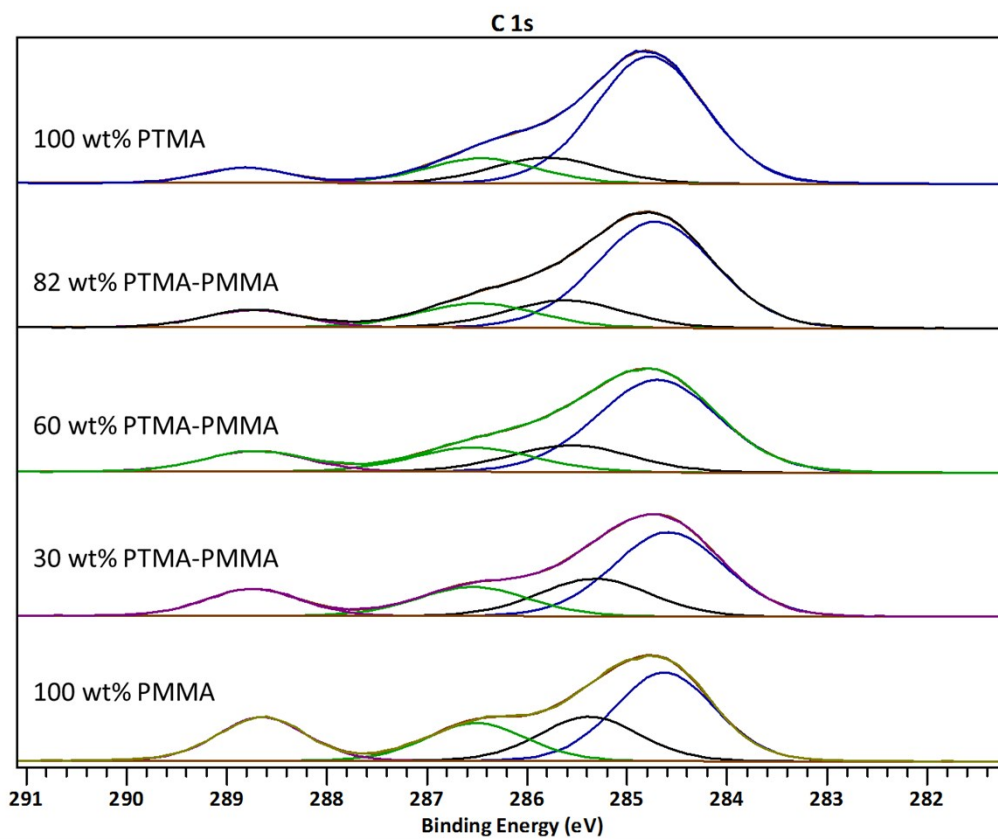

Figure 11: High resolution XPS spectra of the C1s region for each of the PTMA-PMMA copolymers.

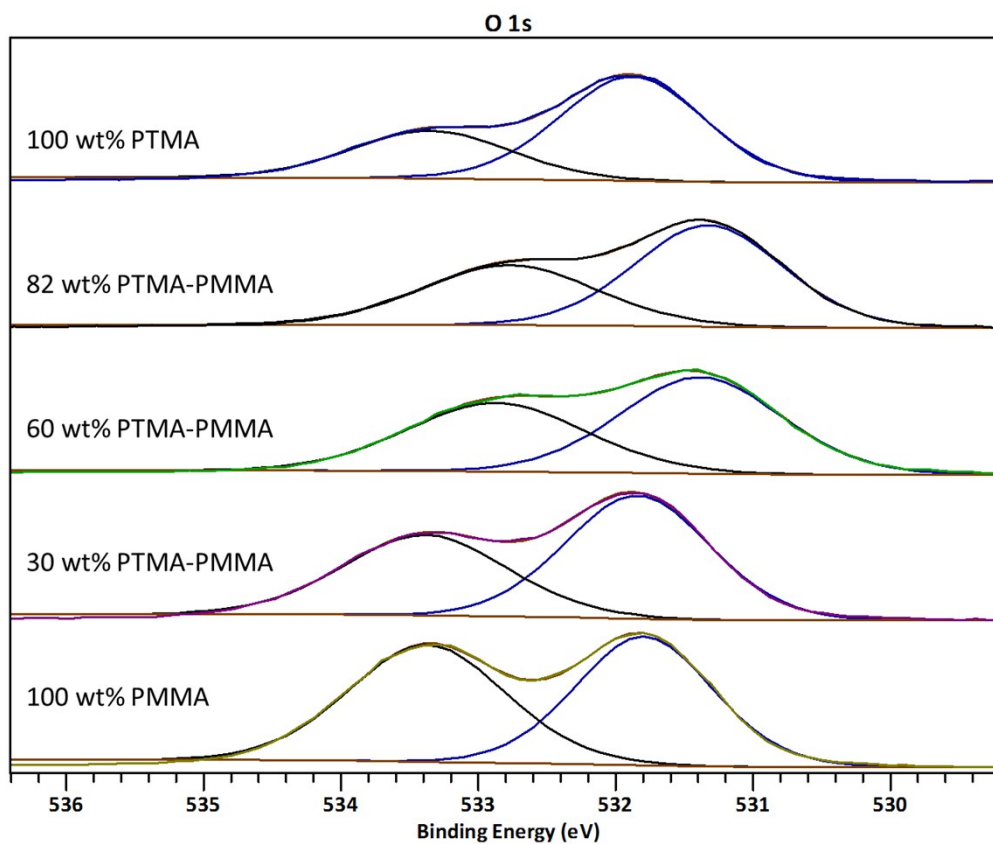

Figure 12: High resolution XPS spectra of the O1s region for each of the PTMA-PMMA copolymers.

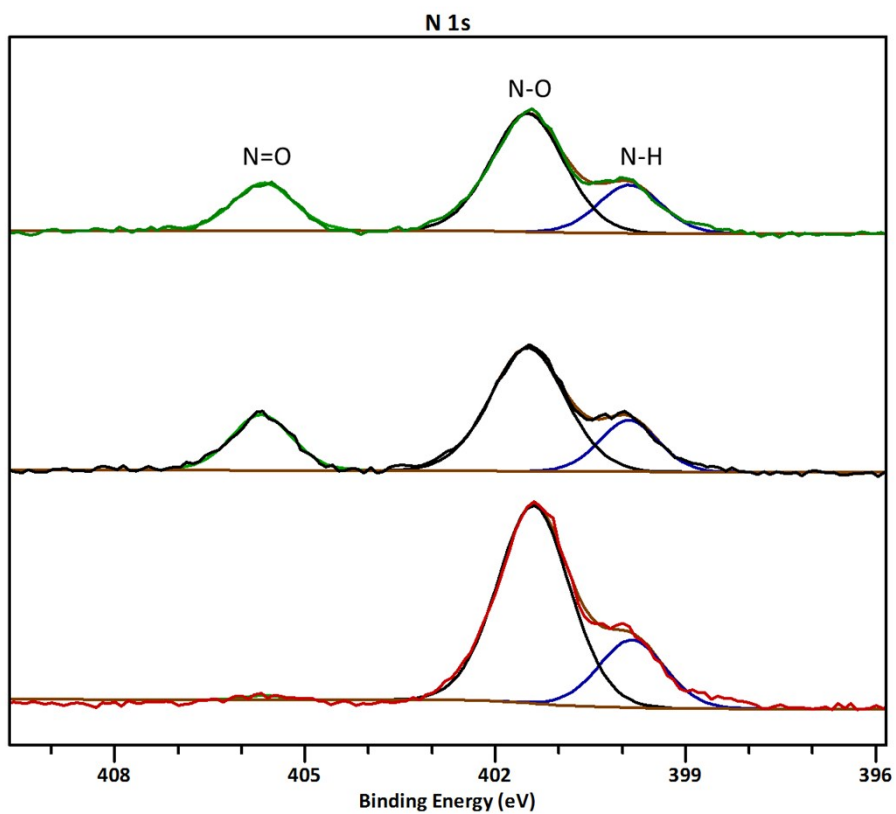

Figure 13: Replicate high resolution XPS N1s spectra acquired for the same 100 wt% PTMA film, at three different locations, demonstrating the variability of the peak at 406 eV.

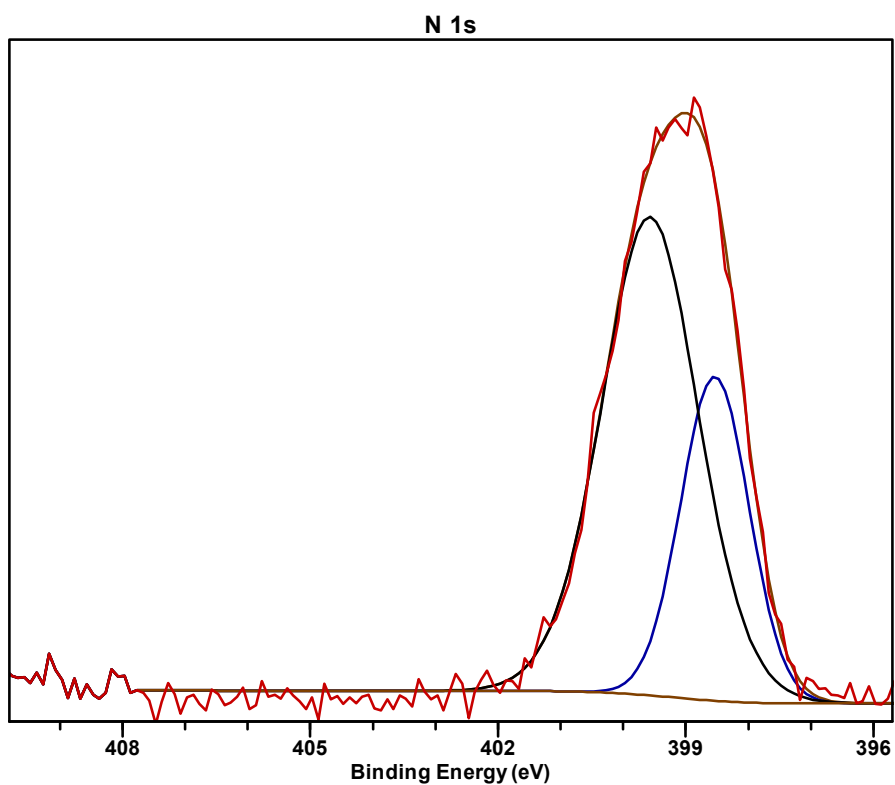

Figure 14: High resolution XPS N1s spectrum of neat PTMA powder, showing that there is no peak at 306 eV for the oxoammonium cation.



Table 1: Summary statistics for two-way ANOVA analysis of anti-biofilm activity of nitroxide copolymer surfaces.

| ANOVA summary                                       |         |
|-----------------------------------------------------|---------|
| <b>F</b>                                            | 13.64   |
| <b>P value</b>                                      | <0.0001 |
| <b>P value summary</b>                              | ****    |
| <b>Significant diff. among means (P &lt; 0.05)?</b> | Yes     |
| <b>R square</b>                                     | 0.7912  |

| ANOVA table                 | SS    | DF | MS     | F (DFn, DFd)      | P value  |
|-----------------------------|-------|----|--------|-------------------|----------|
| Treatment (between columns) | 50.51 | 5  | 10.1   | F (5, 18) = 13.64 | P<0.0001 |
| Residual (within columns)   | 13.33 | 18 | 0.7406 |                   |          |
| Total                       | 63.84 | 23 |        |                   |          |

| Dunnett's multiple comparisons test  | Mean Diff. | 95.00% CI of diff. | Summary | Adjusted P Value | % reduction in attached bacteria |
|--------------------------------------|------------|--------------------|---------|------------------|----------------------------------|
| 0 wt% PTMA-PMMA vs. 30 wt% PTMA-PMMA | 2.58       | 0.8991 to 4.26     | **      | 0.0021           | 99.69                            |
| 0 wt% PTMA-PMMA vs. 60 wt% PTMA-PMMA | 2.47       | 0.7894 to 4.15     | **      | 0.0032           | 99.69                            |
| 0 wt% PTMA-PMMA vs. 82 wt% PTMA-PMMA | 3.122      | 1.442 to 4.802     | ***     | 0.0003           | 99.91                            |
| 0 wt% PTMA-PMMA vs. 100 wt% PTMA     | 4.115      | 2.435 to 5.796     | ****    | 0.0001           | 99.96                            |
